# Supplementary material
Source: PubMed Central journal article supplement (PMC4966445)
Supplement: JB.00144-16_zjb999094128so1.pdf [file JB.00144-16_zjb999094128so1.pdf]

**Table S1:** DNA primers used in this study for recombineering.

| <u>Targeted mutation</u> | <u>Primer sequence</u>                                           | <u>DNA template</u> |
|--------------------------|------------------------------------------------------------------|---------------------|
| $\Delta U-Z$ 1           | gatggatcaactatattacgtccctgaggaggatgacaagtgtaggctggagctgcttc      | pKD4                |
| $\Delta U-Z$ 2           | cgcccgatagcgcaacgtttatcgggcgtctttacctcacatatgaatatcctccttagttcc  | pKD4                |
| $\Delta H-Z$ 1           | accagaccgagcgcgtcggctttaccggctacgtccatctgtgtaggctggagctgcttc     | pKD4                |
| $\Delta H-Z$ 2           | cgcccgatagcgcaacgtttatcgggcgtctttacctcacatatgaatatcctccttagttcc  | pKD4                |
| $\Delta U-V$ 1           | ttgtagtctcacaattagcattggcttgactctggcaatgtgtaggctggagctgcttc      | pKD4                |
| $\Delta U-V$ 2           | taatattcggagggcaaacggtaatactgatcagttgccatatgaatatcctccttagttcc   | pKD4                |
| $\Delta U$ 1             | ttgtagtctcacaattagcattggcttgactctggcaatgtgtaggctggagctgcttc      | pKD4                |
| $\Delta U$ 2             | gggtaggcgtgaagtcttcgtgaagctgaactgagfacatatgaatatcctccttagttcc    | pKD4                |
| $\Delta iprA$ 1          | aatgcatatgttatctttaagcaagccactacaggaattctgtgtaggctggagctgcttc    | pKD4                |
| $\Delta iprA$ 2          | taatattcggagggcaaacggtaatactgatcagttgccatatgaatatcctccttagttcc   | pKD4                |
| $\Delta katN$ 1          | caactcaataactgtgcgagtgagcgaacctaactcgcatatgaatatcctccttagttcc    | pKD3                |
| $\Delta katN$ 2          | cgcagcctagtctcgcgccagtgagaggatcaacgggtgggtgtgtaggctggagctgcttc   | pKD3                |
| $\Delta katG$ 1          | atgagcacgaccgacgataaccataaacggtatccactgtgtgtaggctggagctgcttc     | pKD4                |
| $\Delta katG$ 2          | gcagatcgaaacgggccagttcatcactttcacccatgccatatgaatatcctccttagttcc  | pKD4                |
| $\Delta katE$ 1          | cgtgcatgatacccgtgaatcacagcccggcctggactcccatatgaatatcctccttagttcc | pKD3                |
| $\Delta katE$ 2          | gcacgcgaccagacacgggtgtcccgccatcagcgtcagcatgtgtaggctggagctgcttc   | pKD3                |
| $\Delta oxyR$ 1          | atgaatattcgtgatcttgaatatctggtggcgtagccgcatatgaatatcctccttagttcc  | pKD3                |
| $\Delta oxyR$ 2          | taacgcctgtcgaatggccatccattgcgccacggatgggtgtaggctggagctgcttc      | pKD3                |
| $\Delta dps$ 1           | ttaattacctgggacacaaacatcaagaggatagagattcatatgaatatcctccttagttcc  | pKD3                |
| $\Delta dps$ 2           | tcgaagtattcagggtagatagattattcgcgatgttggtgtgtaggctggagctgcttc     | pKD3                |

|                                       |                                                                                     |        |
|---------------------------------------|-------------------------------------------------------------------------------------|--------|
| <i>ΔahpC</i> 1                        | aatttcgtaacttactcctcaacgaaaacacggagggaagtgtgtaggctggagctgcttc                       | pKD4   |
| <i>ΔahpC</i> 2                        | gtttgtaaggaacgggtggaatcgcctgcggcgaagaccatagaatacctccttagttcc                        | pKD4   |
| <i>ΔtsaA</i> 1                        | gccccggtgcttctaaaacccttaattgcaggagaatgtgtaggctggagctgcttc                           | pKD3   |
| <i>ΔtsaA</i> 2                        | tggaaatgttctcagccaggtatttagccacgccctccggcatatgaatacctccttagttcc                     | pKD3   |
| <i>ΔN10</i> 1                         | ttgtagtctcacaattagcattggctgcactctggcaatgtgtaggctggagctgcttc                         | pKD4   |
| <i>ΔN10</i> 2                         | aacgcgtaccatgcttagaaaggcattatcgagtctgtacatagcattcctgcaataatgcatatgaatacctccttagttcc | pKD4   |
| <i>ΔC10</i> 1                         | gcgtaagggaattacattgaaatgaataaaggcaaacgtaacaaaaatgttgtaggctggagctgcttc               | pKD4   |
| <i>ΔC10</i> 2                         | cgccccgatagcgaacgtttatcgggcgtctttacctcacatagaatacctccttagttcc                       | pKD4   |
| <i>ΔiprA</i> 1<br><i>E. coli</i>      | cgcaaatgttatctgtagttaaacctcttcaggaattgggtgtaggctggagctgcttc                         | pKD3   |
| <i>ΔiprA</i> 2<br><i>E. coli</i>      | tgaaggcaaacgggtgatagcgaccagttgcctttattccatagaatacctccttagttcc                       | pKD3   |
| <i>ΔiprA</i> 1<br><i>Enterobacter</i> | atgaacgtaaatgcgaaaccactttctgaattaagccggctgtgtaggctggagctgcttc                       | pJW102 |
| <i>ΔiprA</i> 2<br><i>Enterobacter</i> | taatattccgtgggcaaacgggtgatgctgaccagtttgccatagaatacctccttagttcc                      | pJW102 |

**Table S2.** Quality control information for RNA-Seq samples obtained via FastQC.

| <b><u>Sample</u></b>           | <b><u>Sample yield (Mb)</u></b> | <b><u>Mean quality score</u></b> | <b><u>Total # reads</u></b> | <b><u># reads with at least one alignment</u></b> | <b><u>% R1 reads with at least one reported alignment</u></b> |
|--------------------------------|---------------------------------|----------------------------------|-----------------------------|---------------------------------------------------|---------------------------------------------------------------|
| $\chi$ 3339 WT log             | 1,507                           | 37.5                             | 30,151,350                  | 23,669,313                                        | 78.5                                                          |
| $\chi$ 3339 WT stat            | 1,403                           | 37.4                             | 28,061,794                  | 19,990,513                                        | 71.24                                                         |
| $\chi$ 3339 $\Delta iprA$ log  | 1,812                           | 36.6                             | 36,257,174                  | 28,330,268                                        | 78.14                                                         |
| $\chi$ 3339 $\Delta iprA$ stat | 1,416                           | 37.4                             | 28,323,658                  | 19,884,125                                        | 70.2                                                          |

**Table S3:** DNA primers used in this study for RT-qPCR and flagella analysis.

| <u>Target gene</u> | <u>Primer sequence</u>               |
|--------------------|--------------------------------------|
| SL1344_1490 1      | CAGGAAATGCAGGCGAACGGTGACGGCTGG       |
| SL1344_1490 2      | CATCACTTCAATAACGGTAACGCCGAGTTC       |
| SL1344_1660 1      | TCTTCCTAAACTTGCCAGAGCCACGTCCAA       |
| SL1344_1660 2      | GCTATAGCCGAGCTGCTCGGCCAGGGTGGC       |
| <i>spvR</i> 1      | TAACACTGATGGAAACAGGTTCTTCAGTATC      |
| <i>spvR</i> 2      | TACAGGTGTTCCGGCCAGCCTGTTGATATC       |
| <i>spvB</i> 1      | TCCCGTCACCTGCTTCGCGTACGG             |
| <i>spvB</i> 2      | GGTCGCGTTGCCATACTGTACCTTGC           |
| SL1344_2887 1      | GAAGCTAACCCAGCTCAAAAACCTCTACT        |
| SL1344_2887 2      | CAACACAATCTTGATTACAGTCTCGAGTTC       |
| SL1344_2185 1      | GTGCAGCATGATACAAAGGTTGTGAGTATG       |
| SL1344_2185 2      | ACGTTTAATGTCACCATCATCGATATACCA       |
| <i>fimA</i> 1      | AACGGAGCCGACAGGATGCCGAAACCGGG        |
| <i>fimA</i> 2      | CTGCCAGGACCGGTAAACGCATTTCGTGCGG      |
| <i>lpxC</i> 1      | CCGTTGAGCACCTGAATGCTGCTCTGGCGG       |
| <i>lpxC</i> 2      | TCTGGCGCATGAACGCATCCGCAGAGAAGT       |
| FljB on 1          | TCGGTATAAGACATTTTGACCAACTCAGCGCCATTA |
| FljB on 2          | CGTATTAACATATATAGTGTAACGCGCTCACGATA  |
| FliC on 1          | TCGGTATAAGACATTTTGACCAACTCAGCGCCATTA |
| FliC on 2          | TTTCAGACAATGAGGTAAACGTACCGACAGCA     |

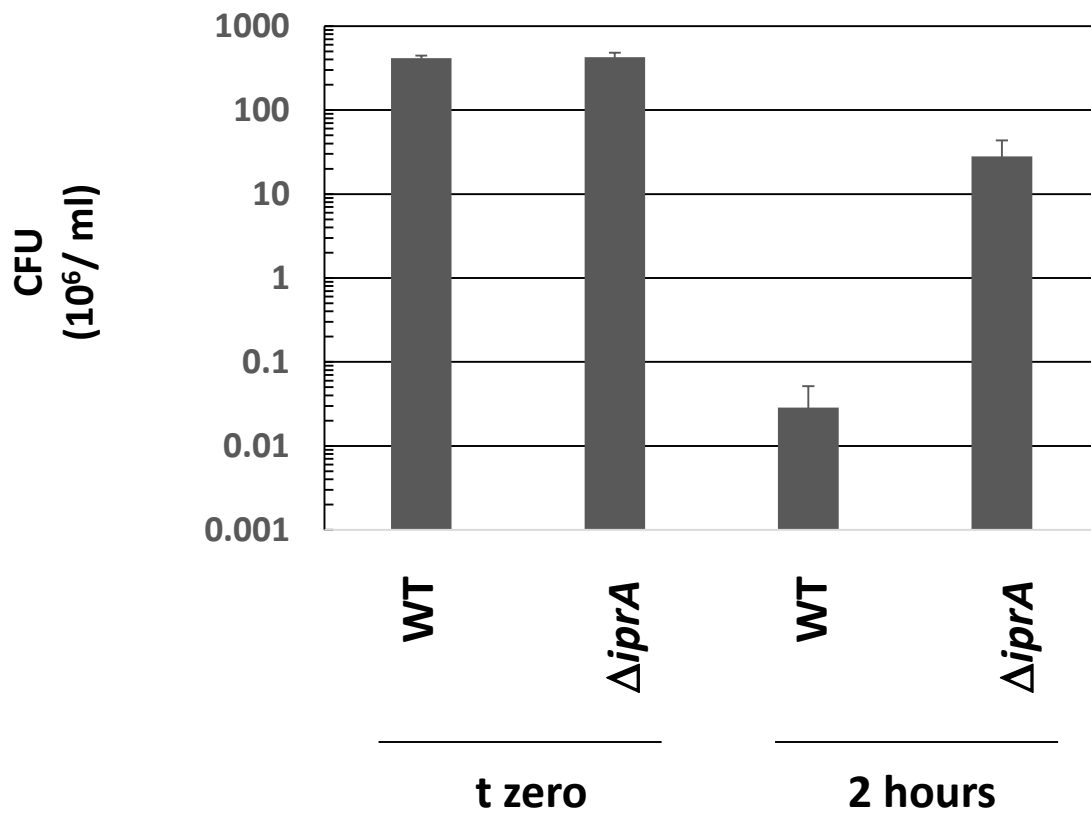

**Figure S1: CFU levels of strains used in *S. Typhimurium*  $\chi$ 3339 WT vs.  $\Delta iprA$  oxidative stress experiments.** Cultures inoculated into fresh LB broth media were grown for 4 hours and then harvested for use in oxidative stress assays. The CFU level of the cultures was assayed before addition of the stress and then at 2 hours after stress addition (70 mM H<sub>2</sub>O<sub>2</sub>). Data is from two independent experiments and is representative of all experiments of this assay in terms of demonstrating equivalent CFU levels of WT and mutant at the start of the assay.

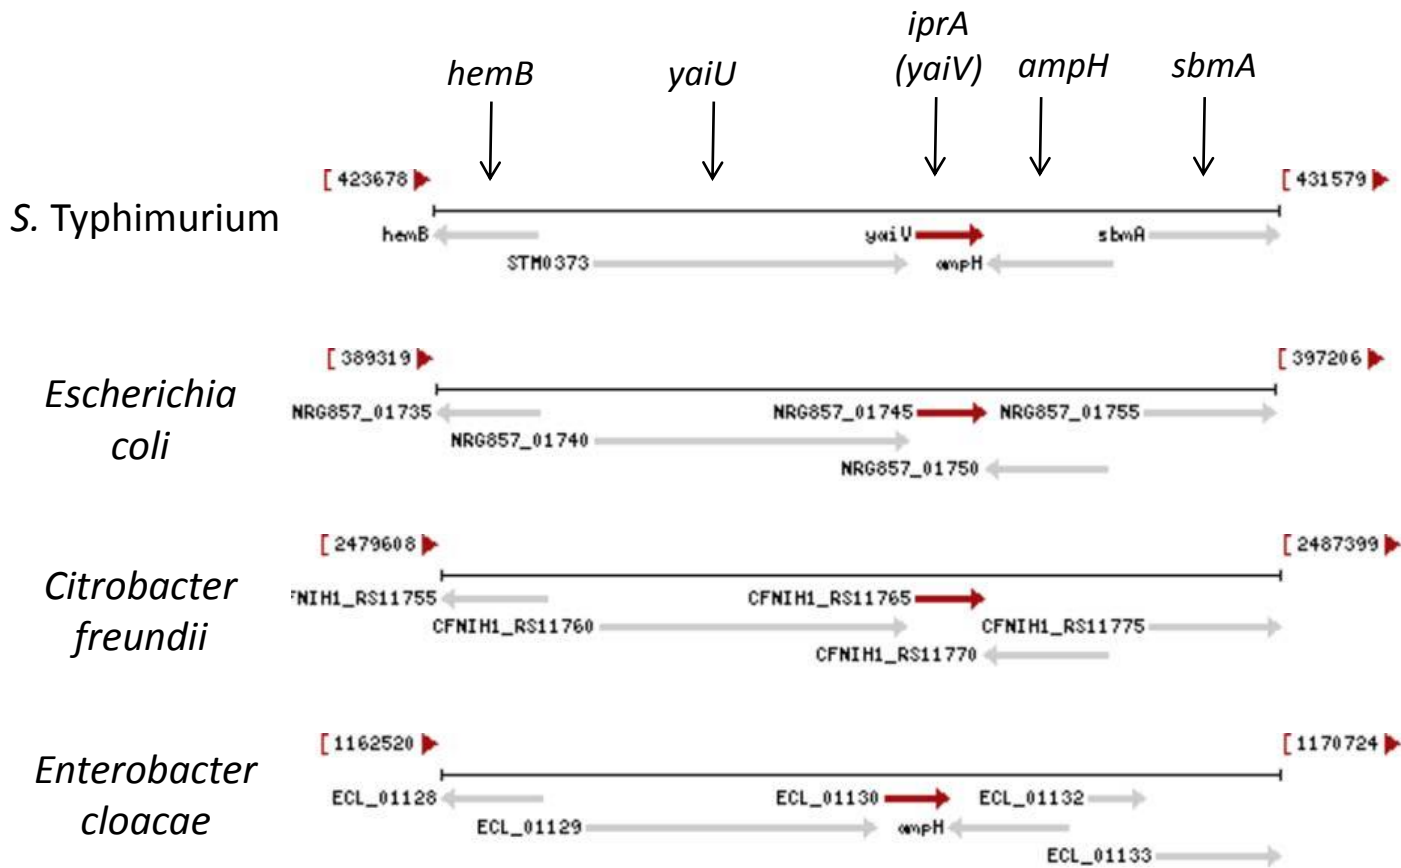

**Figure S2: Synteny of the *iprA* gene locus across Enterobacteriaceae.** The *iprA* gene is in red color for each genus. The specific strains used in this analysis were *S. Typhimurium* LT2, *E. coli* NRG 857C, *C. freundii* CFNIH1, and *E. cloacae* ATCC 13047.

Pssm-ID: 237999; Interval: 23-116; Cd Length: 115; Bit Score: 48.86; E-value: 3.52e-08

gi 16418876 23 TRFEFVNDKEIICSPDESNTHTFVILEGVVSLVR---GDKVLIGIVQAPFIFGLADGVAKKEAQYKLI A ESGCIGYRLS 98

Cdd:cd00038 17 LEERRFPAGEVIIRQGD PADS LYIVLSGSVEVYKldedGREQIVGFLGPGDLFGELALLGNGPRSATVRALTDSELLVLP 96

gi 16418876 99 SSQTLAII EQNLWREAF 116

Cdd:cd00038 97 RSDFRLLQEYPELARRL 114

gi 16418876 = query (IprA)

Cdd:cd00038 = consensus

**Figure S3: Alignment of IprA predicted CAP effector binding domain with consensus.** The *S. Typhimurium* IprA predicted CAP effector binding domain (amino acids 23 - 116) was aligned with the consensus domain sequence using the Conserved Domains tool via National Center for Biotechnology Information (<http://www.ncbi.nlm.nih.gov>). In the alignment, "gi 16418876" is the IprA sequence and "Cdd:cd00038" is the consensus.

```

#HMM      sYeliralLlelielpelreninvlkyIqerTnLSRSsilkvLseLkkggyTeierGkLvkinLPe
#MATCH    sY++ira+L+++ie+teelr++i v++yI++rT++SRS++++vL++L+kg+yI+++GkL++in+LP+
#PP       8*****5
#SEQ      SYDQIRATLMTMIEWDEELRSRIGVMNYIHQRTRVSRVVAEVLAAALRKGNYIEMNKGKGLISINRLPS
(138-205)

```

#HMM = consensus sequence

#SEQ = query (IprA)

| <u>Envelope</u> |            | <u>Alignment</u> |            | <u>HMM</u>  |           | <u>HMM</u>    | <u>Bit</u>   | <u>E-value</u> |
|-----------------|------------|------------------|------------|-------------|-----------|---------------|--------------|----------------|
| <u>Start</u>    | <u>End</u> | <u>Start</u>     | <u>End</u> | <u>From</u> | <u>To</u> | <u>length</u> | <u>score</u> |                |
| 138             | 205        | 138              | 205        | 1           | 68        | 68            | 101.4        | 1.90E-29       |

**Figure S4: Alignment of the IprA predicted winged helix-turn-helix domain with the consensus.** The predicted winged helix-turn-helix domain of the *S. Typhimurium* IprA protein (amino acids 138 - 205) was aligned with the consensus using the Pfam protein family search tool (<http://pfam.xfam.org>). In the alignment, #HMM is the consensus sequence and #SEQ is the IprA sequence.



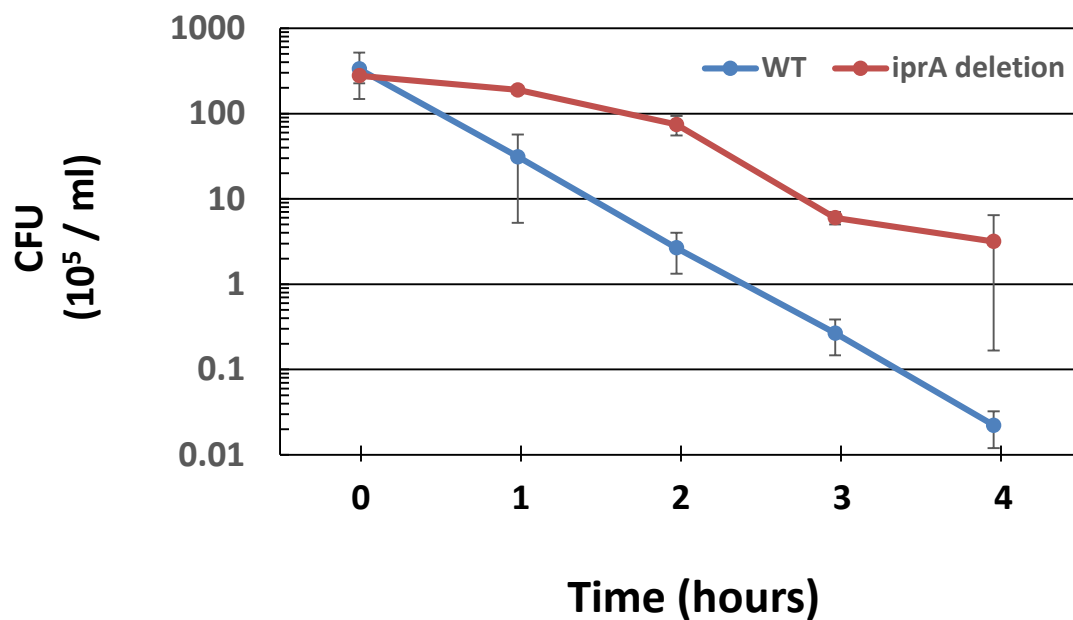

**Figure S5: The  $\Delta iprA$  mutation enhances survival in the presence of oxidative stress under growth curve conditions.** Cultures of *S. Typhimurium* WT and  $\Delta iprA$  strains were diluted into fresh LB broth media containing 5 mM hydrogen peroxide, grown shaking at 37 degrees C, and time point samples taken every hour for 4 hours. The samples were serial diluted and plated for CFU on LB agar plates. Data is the mean and standard deviation from three independent experiments.

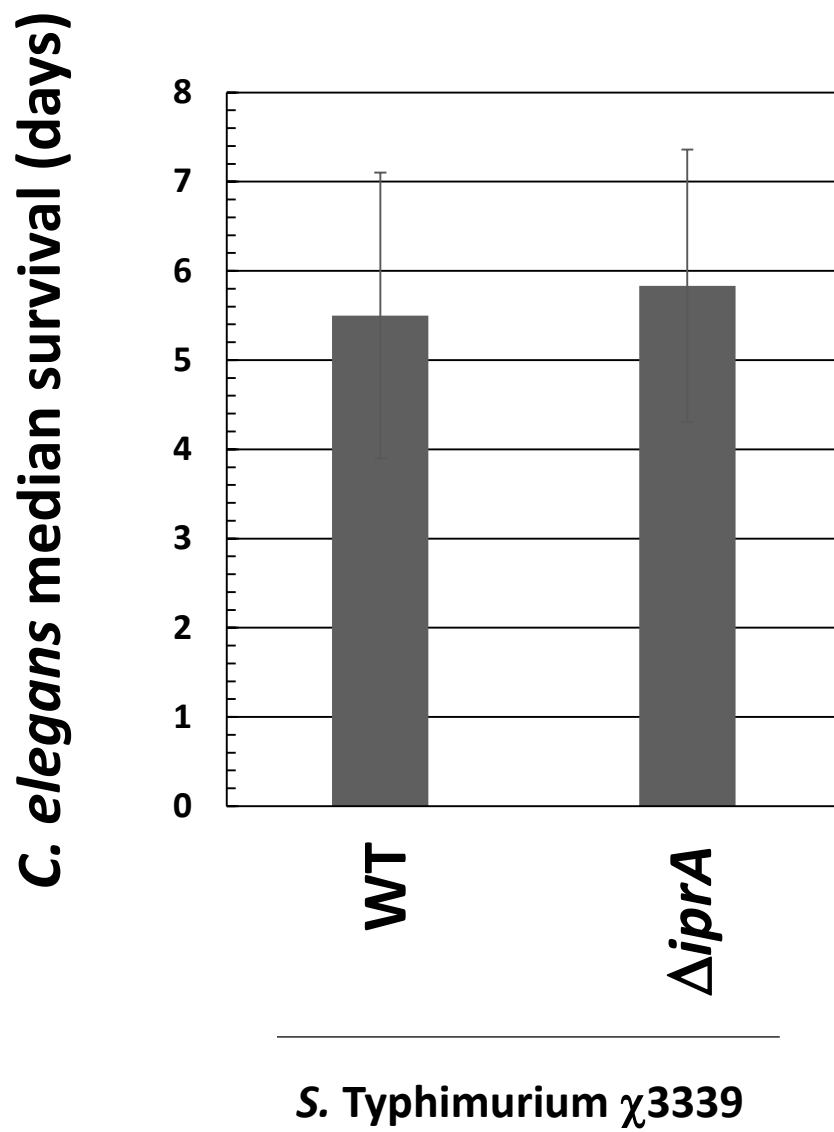

**Figure S6. Survival of *C. elegans* infected with *S. Typhimurium* WT and  $\Delta iprA$  strains.** Separate groups of approximately 100 worms were infected with either *S. Typhimurium*  $\chi$ 3339 WT or  $\Delta iprA$  strains, and the survival of the worms was measured over 15 days. The data are the mean and standard deviation from 3 independent experiments.

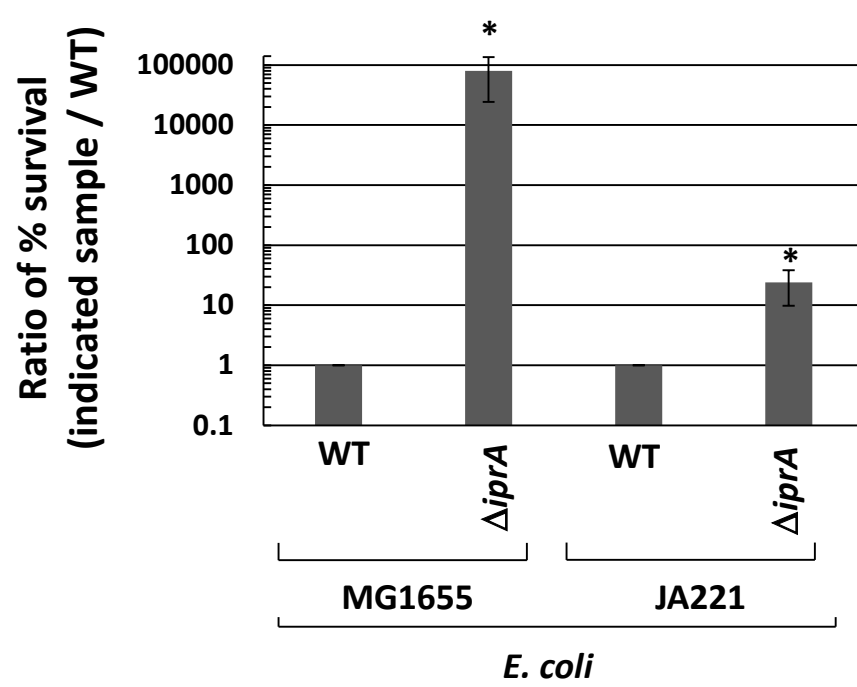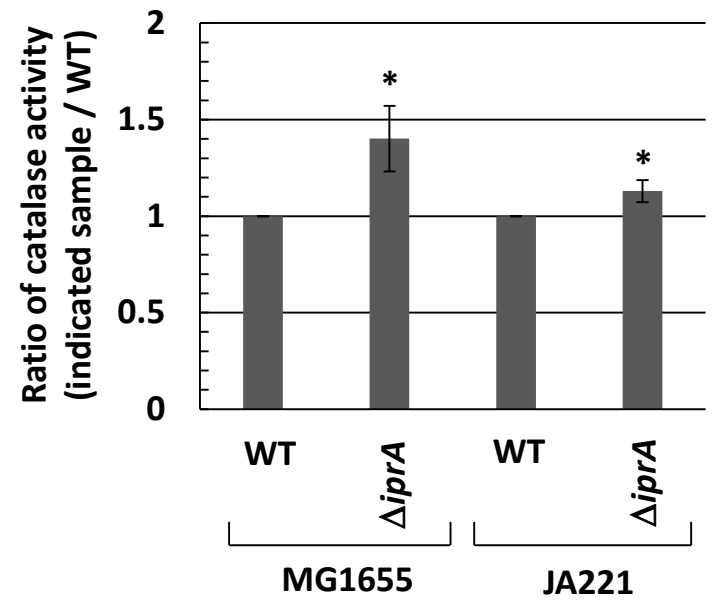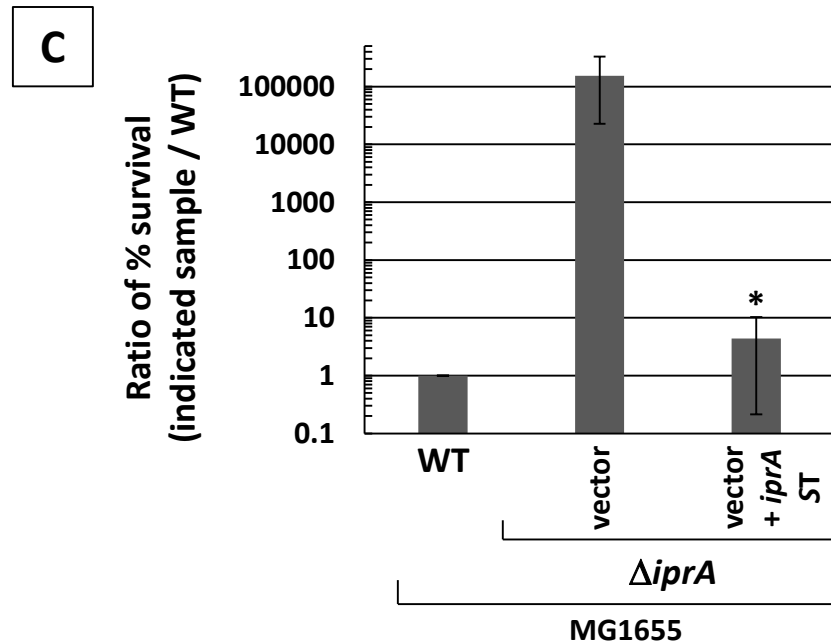

**Figure S7: Characterization of *E. coli* MG1655 and JA221  $\Delta iprA$  strains.** **Panel A.** A  $\Delta iprA$  mutation was constructed in *E. coli* and transferred to *E. coli* strains MG1655 and JA221. The percent survival in oxidative stress of WT and  $\Delta iprA$  was measured and calculated for a ratio to the corresponding WT strains. **Panel B.** Catalase activity was measured in the WT and  $\Delta iprA$  *E. coli* MG1655 and JA221 strains and plotted as a ratio of each sample to the corresponding WT strain. **Panel C.** MG1655  $\Delta iprA$  strain containing plasmid vector and vector + *iprA* ST were assayed for oxidative stress survival and compared to the corresponding WT strain. The *iprA* ST gene is the WT *iprA* gene cloned from *S. Typhimurium*. Data in each panel are shown as the mean plus standard deviation, and observed differences from WT were found to be significant at p-value < 0.05 in all panels using t-test between WT and the indicated mutant sample (as marked via asterisk). In panel C, a t-test comparison was performed between vector and vector + *iprA* as indicated via asterisk.

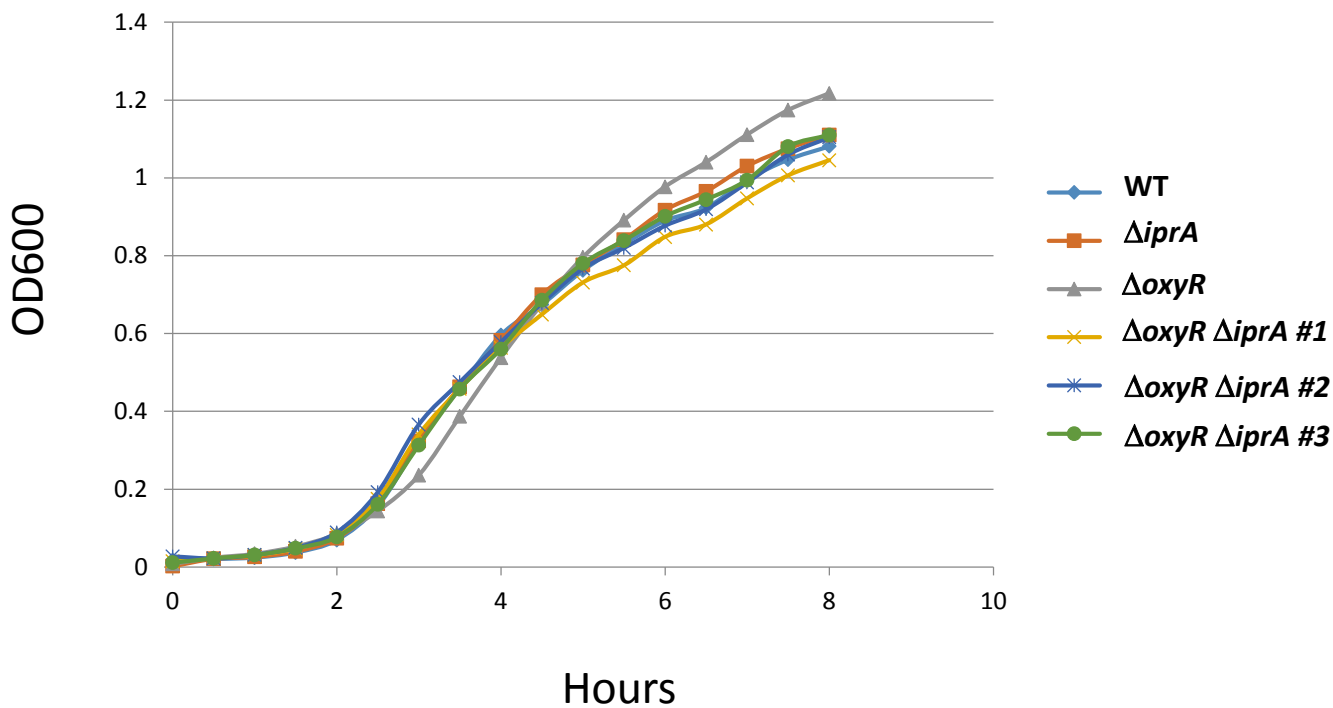

**Figure S8: Growth curve measured via OD600 for *S. Typhimurium*  $\chi$ 3339 WT,  $\Delta iprA$ ,  $\Delta oxyR$ , and  $\Delta iprA \Delta oxyR$  strains.** Equal amounts of cells were used to inoculate fresh LB broth cultures that were incubated shaking at 37 degrees C. At the indicated time points, samples were assayed for OD600 measurements. Three independent  $\Delta iprA \Delta oxyR$  isolates were used in the assay.
